# Supplementary material for: Methylene Blue Bridges the Inhibition and Produces Unusual Respiratory Changes in Complex III-Inhibited Mitochondria. Studies on Rats, Mice and Guinea Pigs
Source: Antioxidants (Basel). 2021 Feb 16;10(2):305. doi: 10.3390/antiox10020305 (PMC7920423; doi:10.3390/antiox10020305)
Supplement: Supplementary file 1 [file antioxidants-10-00305-s001.pdf]

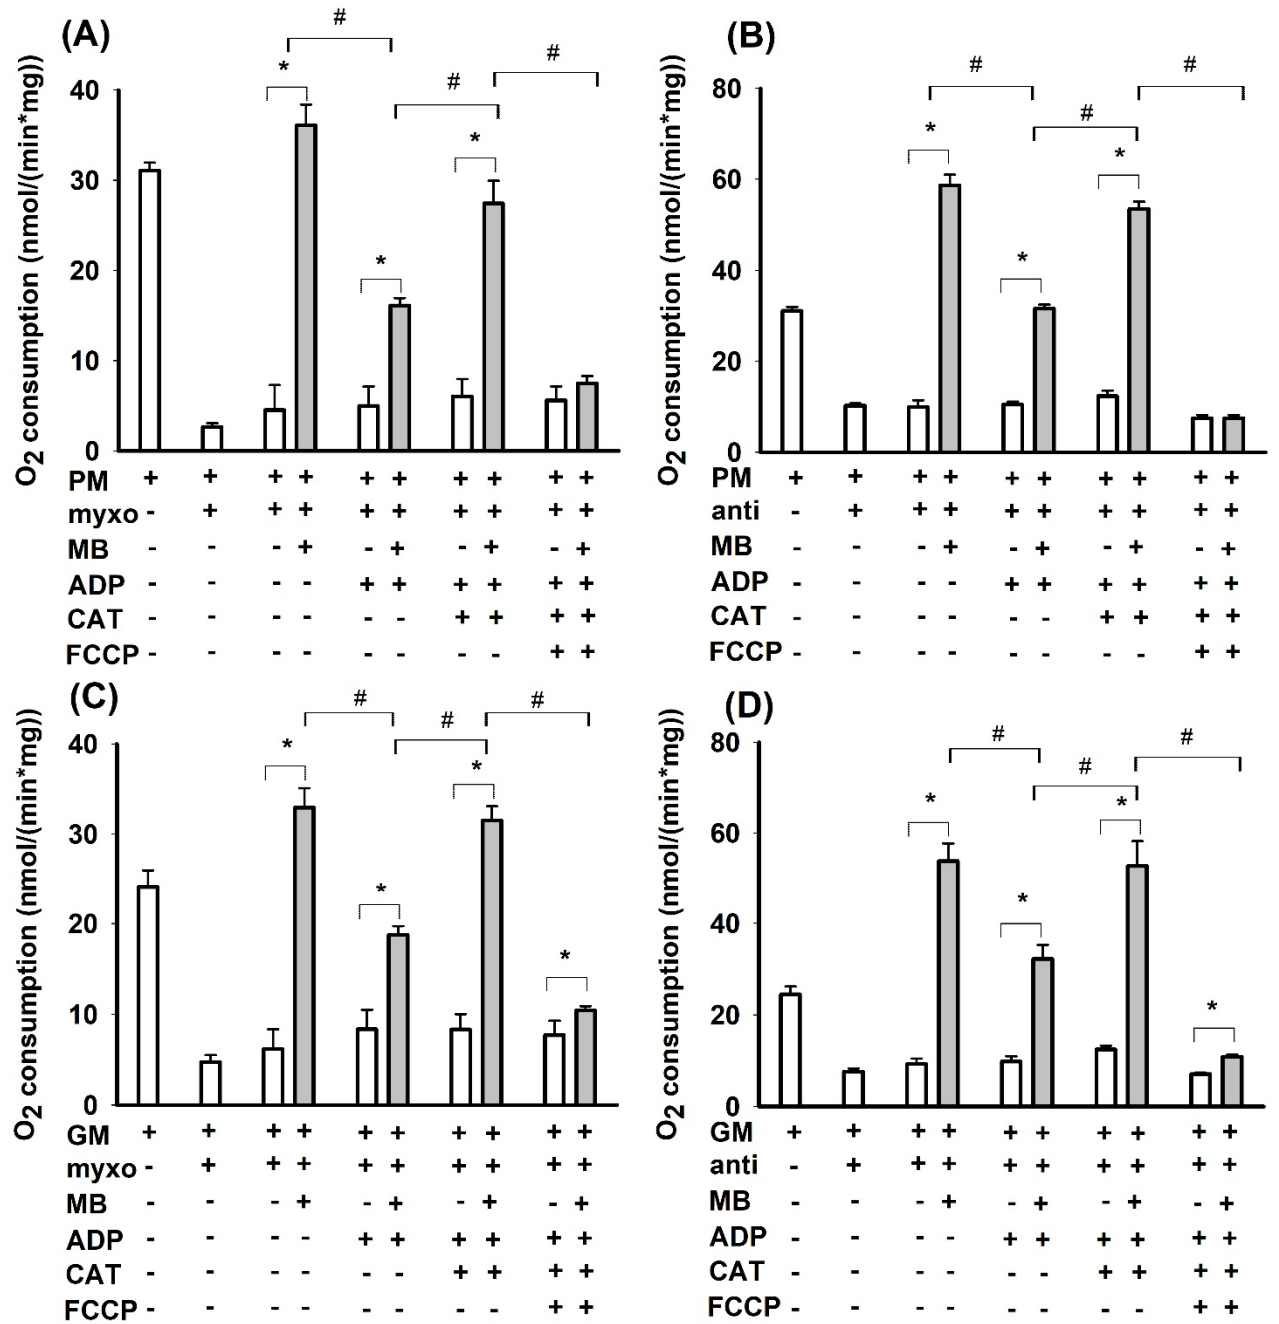

**Figure S1.** Effects of MB (2  $\mu$ M) on the rate of oxygen consumption in complex III-inhibited guinea pig mitochondria;

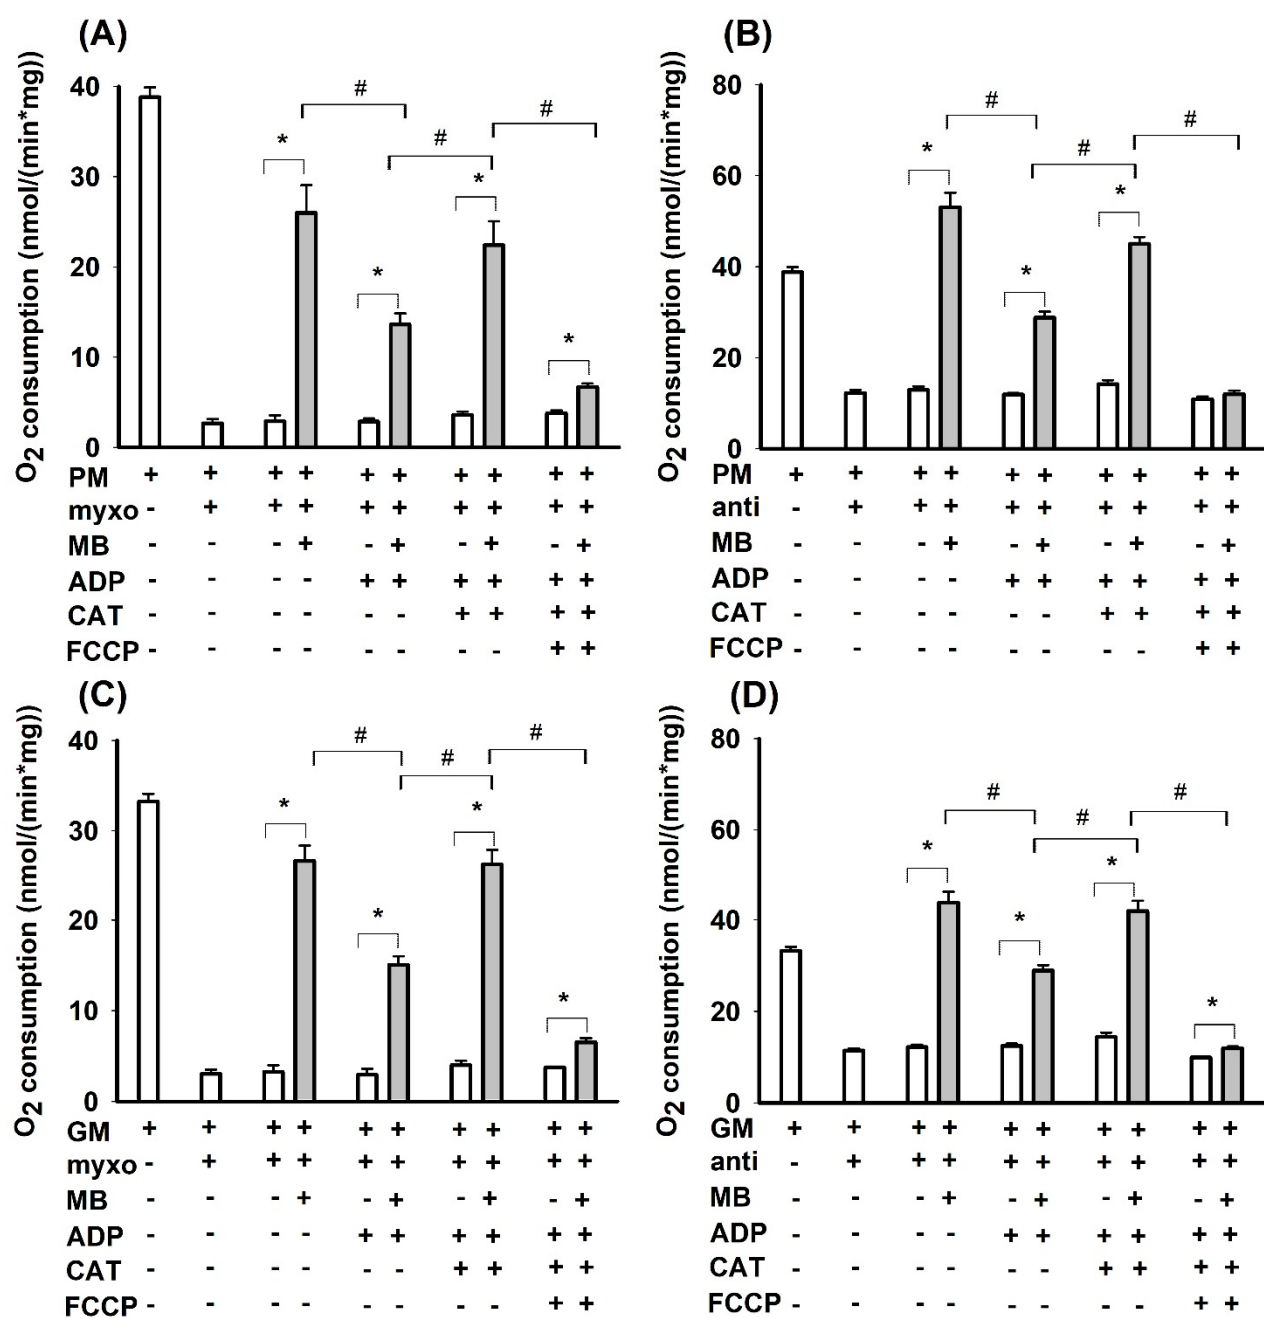

**Figure S2.** Effects of MB (2  $\mu$ M) on the rate of oxygen consumption in complex III-inhibited rat mitochondria;

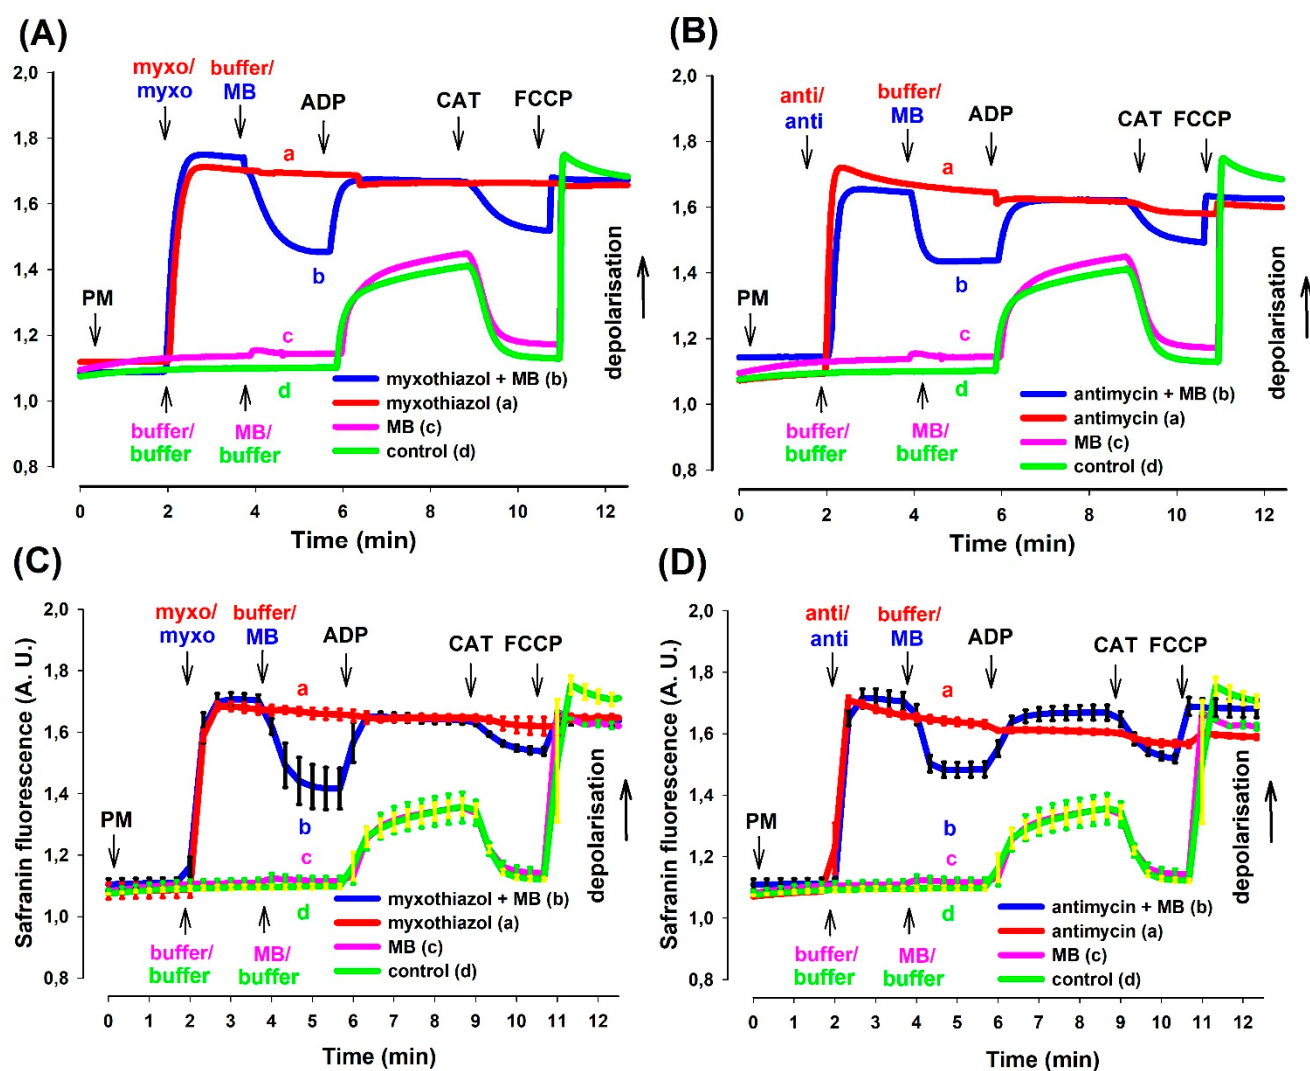

Figure S3. Effects of MB (2  $\mu$ M) on the membrane potential in complex III-inhibited rat mitochondria;

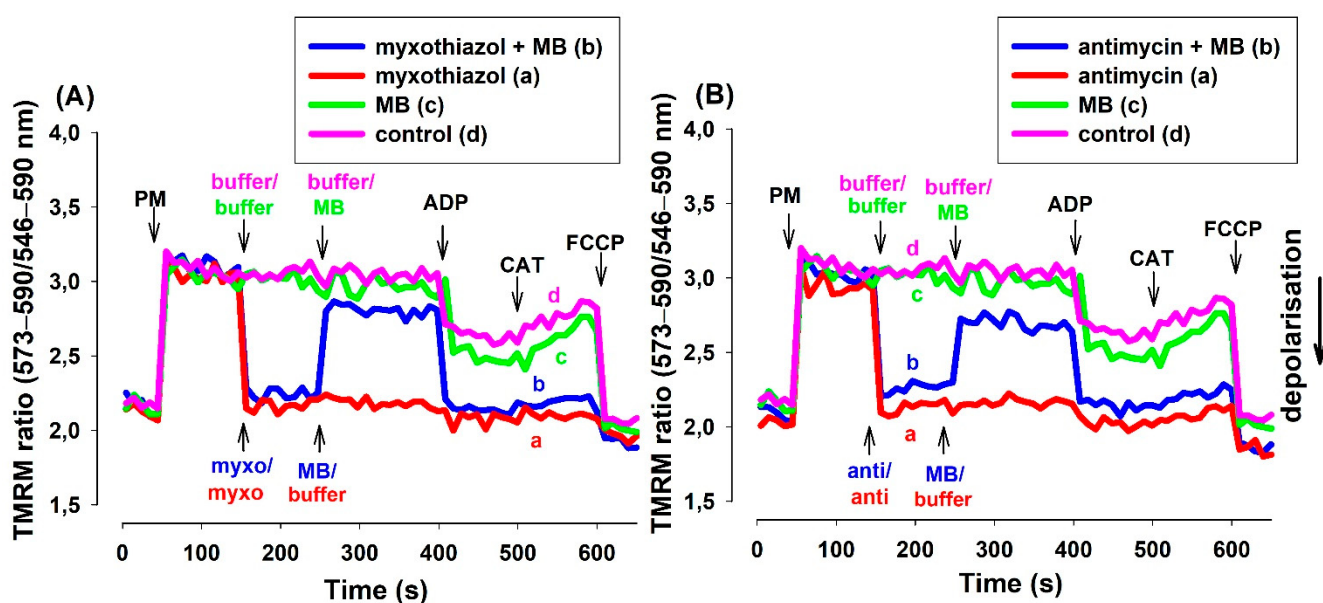

Figure S4. Effects of MB on the membrane potential ( $\Delta\psi_m$ ) of the complex III-inhibited (A: myxothiazol, B: antimycin) treated rat mitochondria;

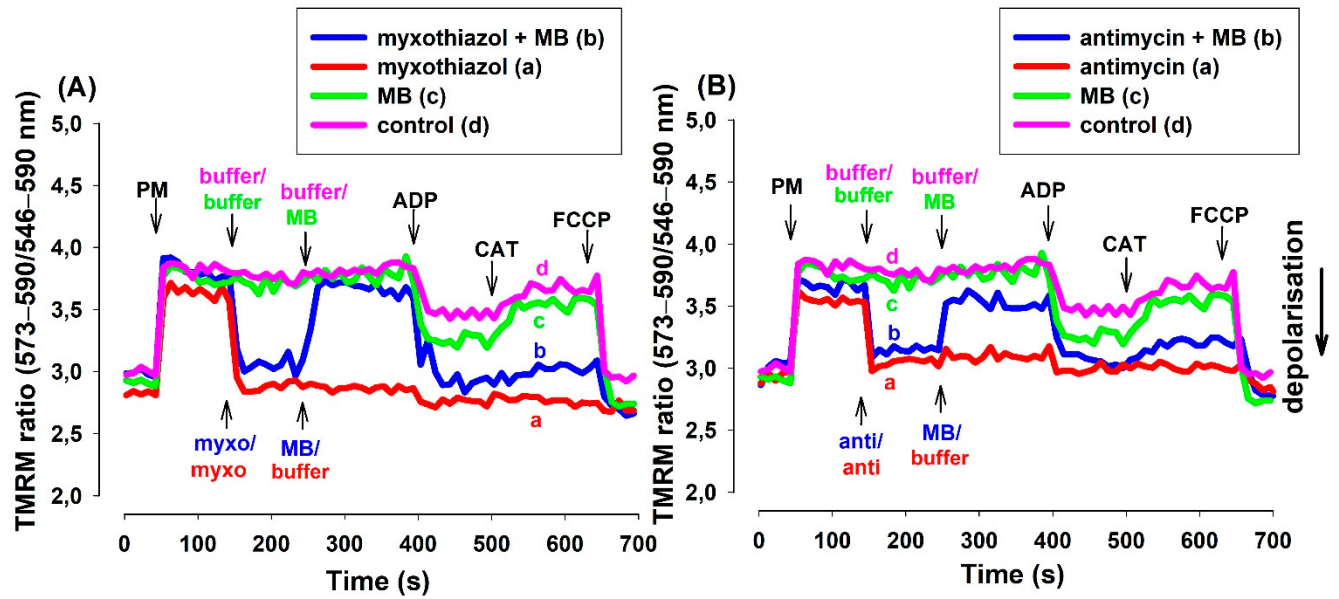

**Figure S5.** Effects of MB on the membrane potential ( $\Delta\psi_m$ ) of the complex III-inhibited (A: myxothiazol, B: antimycin) treated mouse mitochondria;

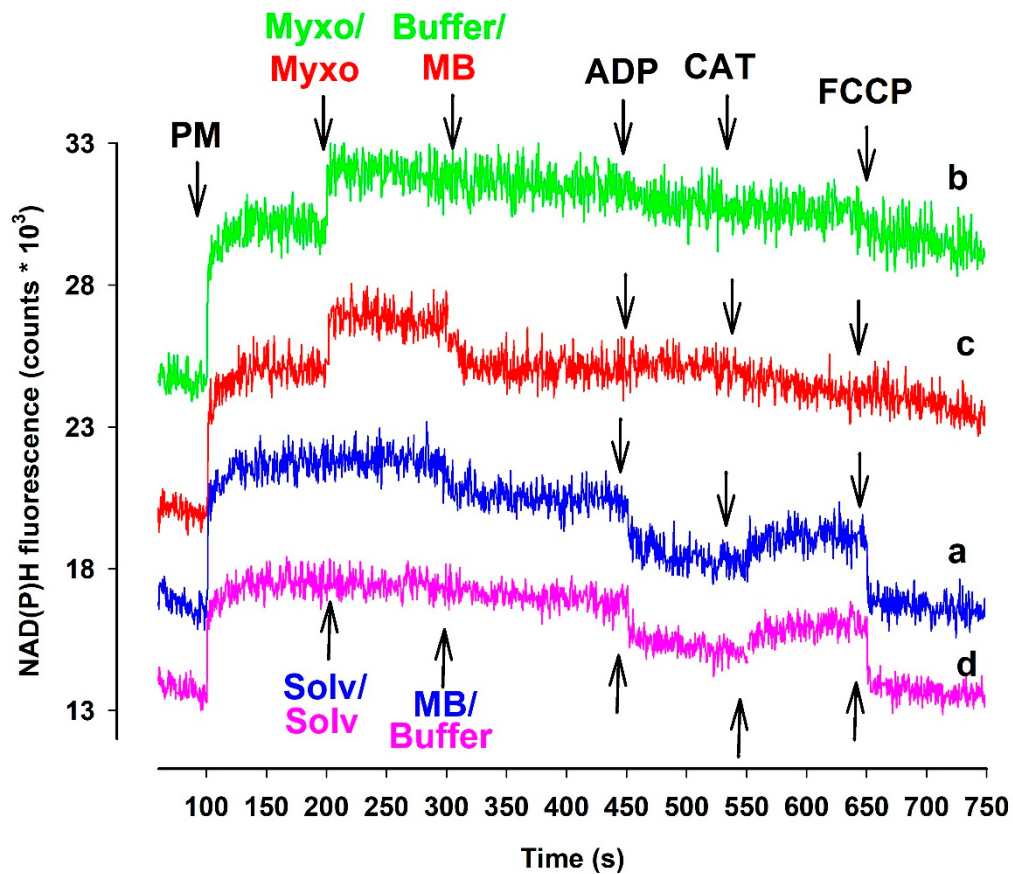

**Figure S6.** The effects of MB (2  $\mu$ M) on NAD(P)H steady state of complex III-inhibited guinea pig mitochondria;

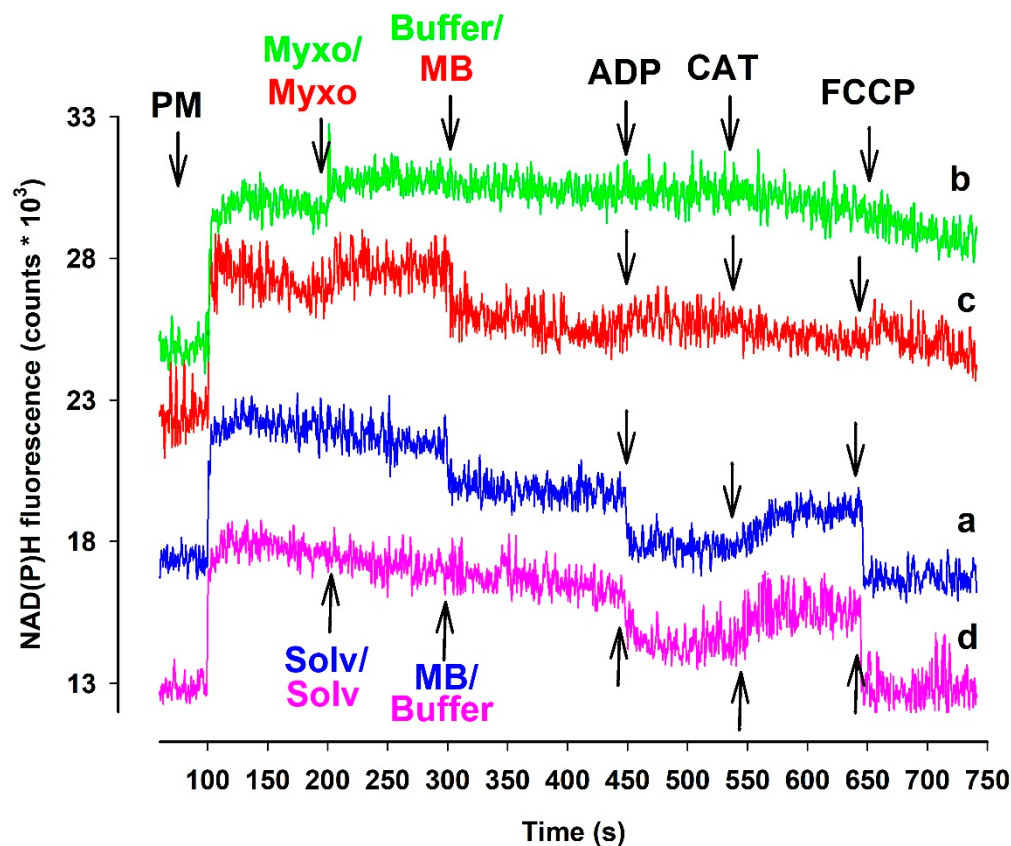

**Figure S7.** The effects of MB (2  $\mu$ M) on NAD(P)H steady state of complex III-inhibited mouse mitochondria;

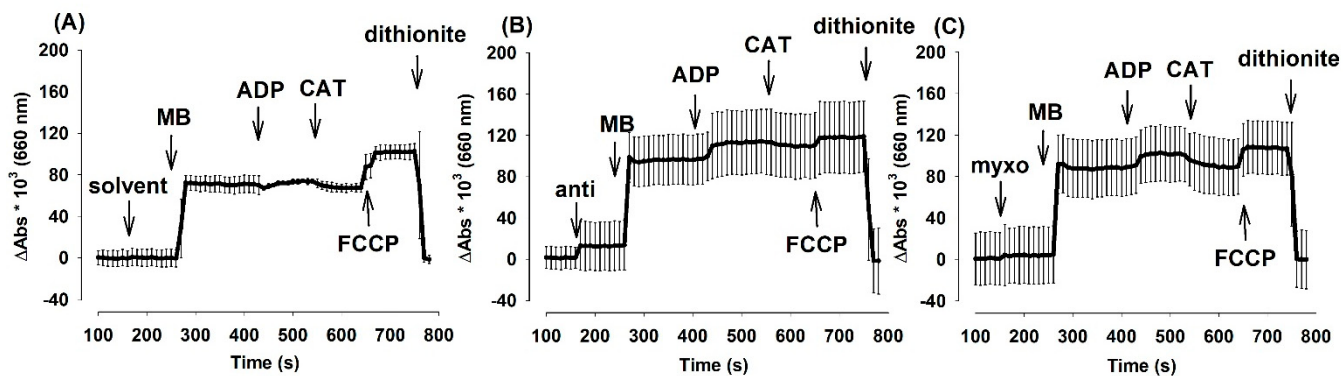

**Figure S8.** The effects of complex III-inhibitors on oxidoreduction steady state of MB (2  $\mu$ M) in **guinea pig** mitochondria. Experiments were performed as described in Materials and Methods. In pyruvate *plus* malate-supported (5-5 mM) mitochondria absorbance differences ( $\Delta \text{Abs}_{660} * 10^3$ ) were detected in the presence or absence of MB in (A): uninhibited (B): myxothiazol (C): antimycin treated mitochondria. Further additions were as indicated. Curves represent the average of three independent experiments  $\pm$  S.E.M.

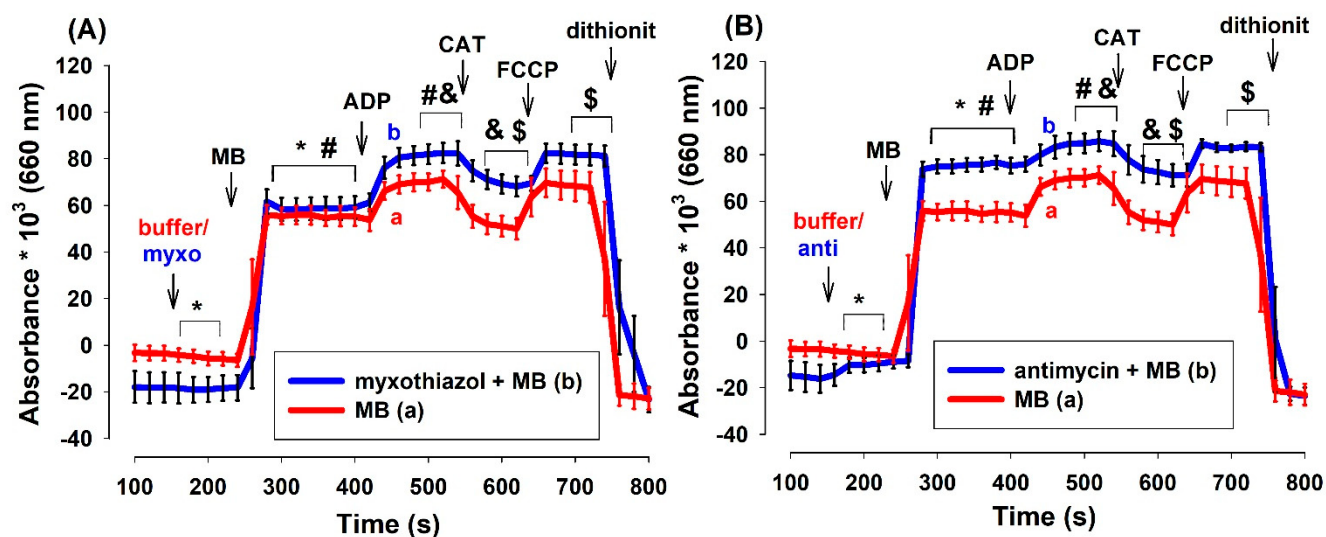

**Figure 9.** The effects of complex III-inhibitors on oxidoreduction steady state of MB (2  $\mu$ M) in guinea pig mitochondria.
